# Supplementary material for: How Does Ambient Air Temperature Affect Diabetes Mortality in Tropical Cities?
Source: PubMed Central journal article supplement (PMC5409586; doi:10.3390/ijerph14040385), 2017-04-05
Supplement: ijerph-14-00385-s001.pdf [file ijerph-14-00385-s001.pdf]

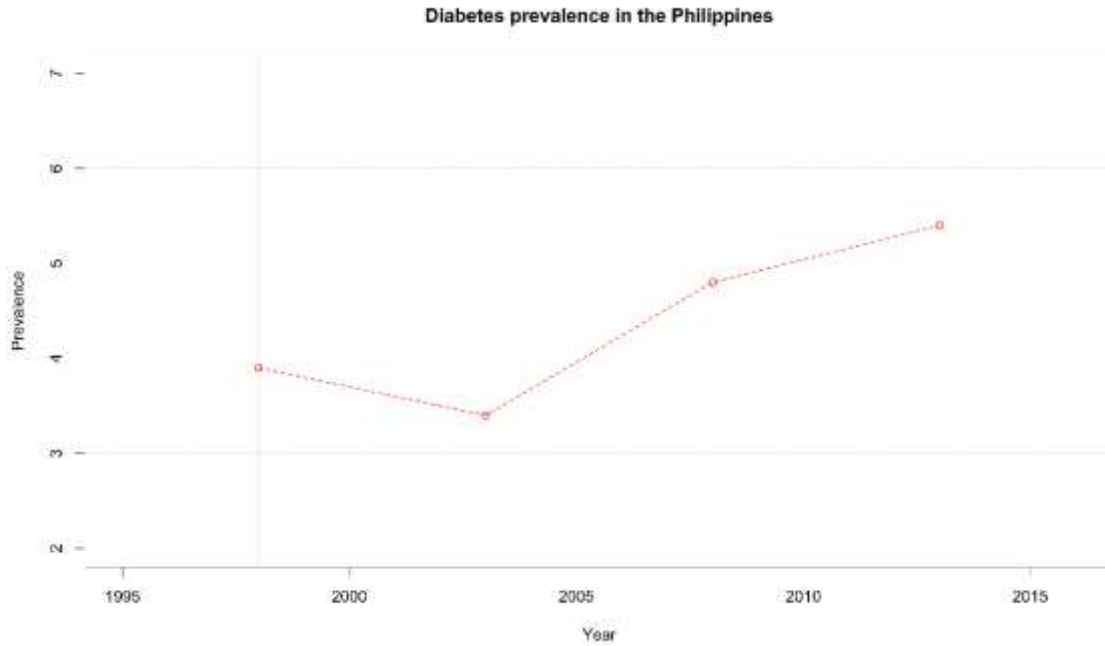

Figure S1. Diabetes prevalence from 1998-2013

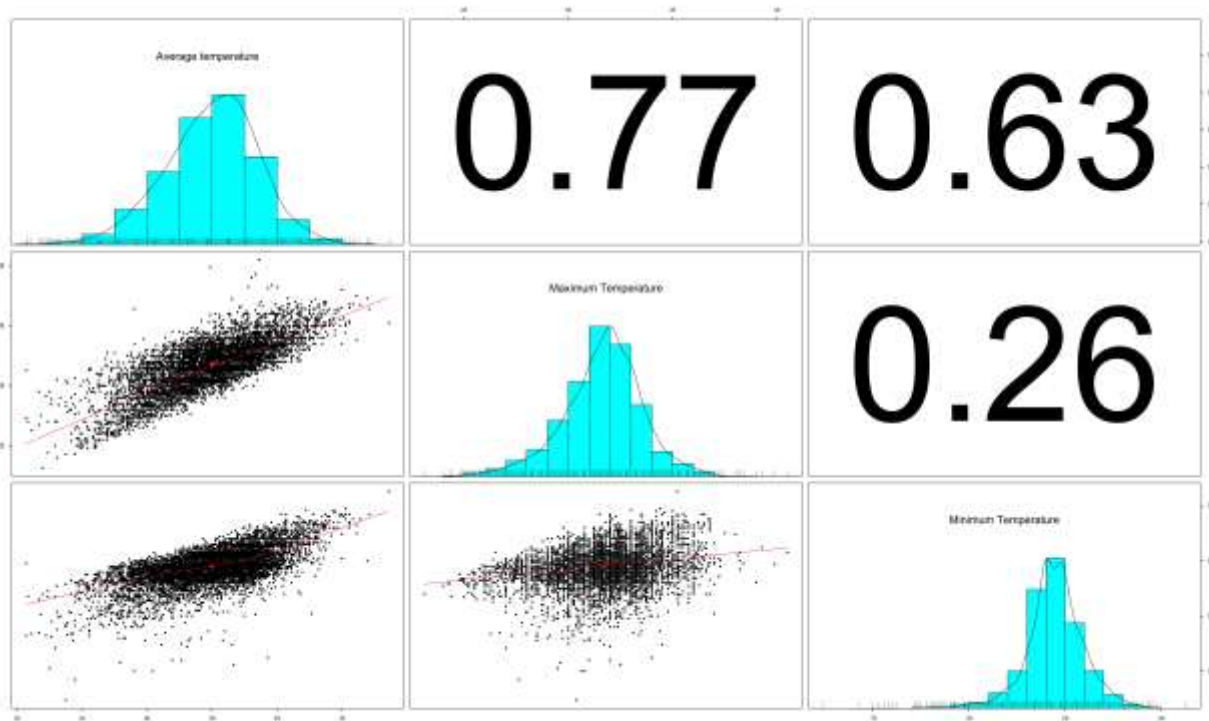

Figure S2. Correlational relationship of minimum, average and maximum temperature

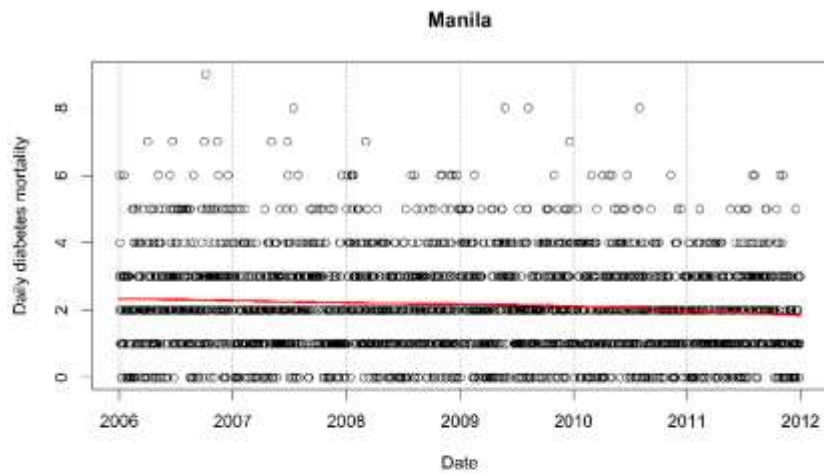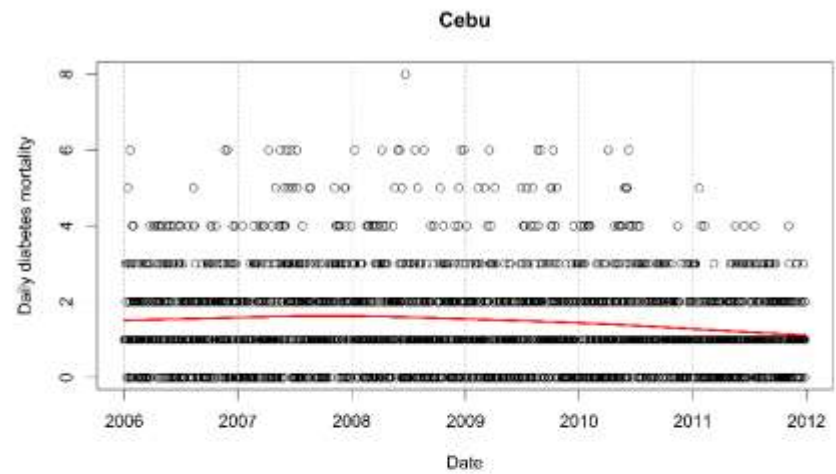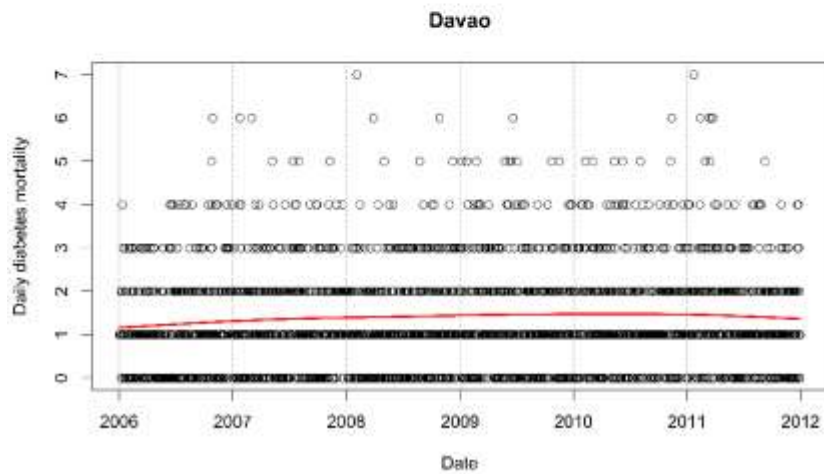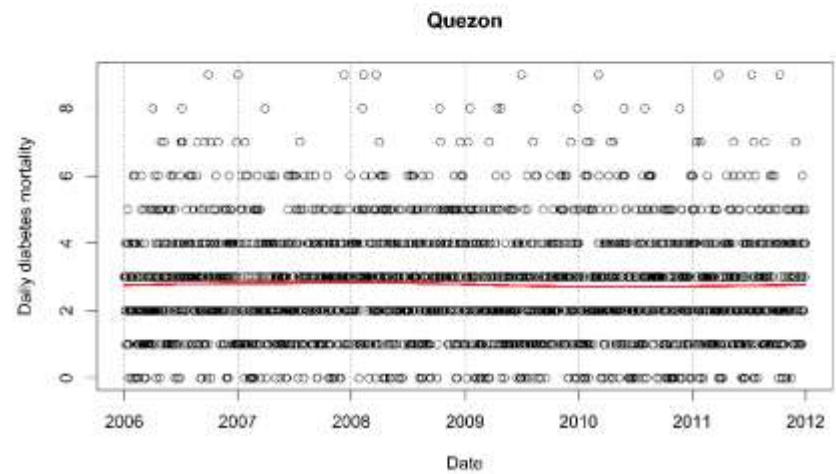

Figure S3. Time series trends of daily diabetes mortality per city from 2006-2011

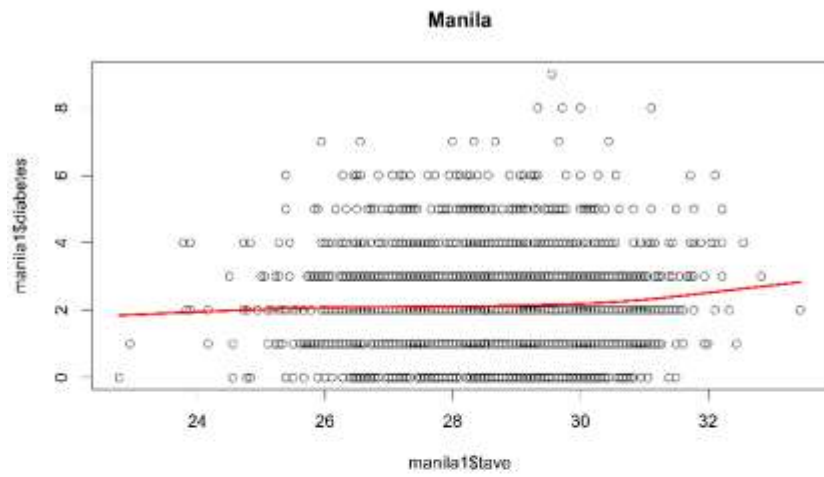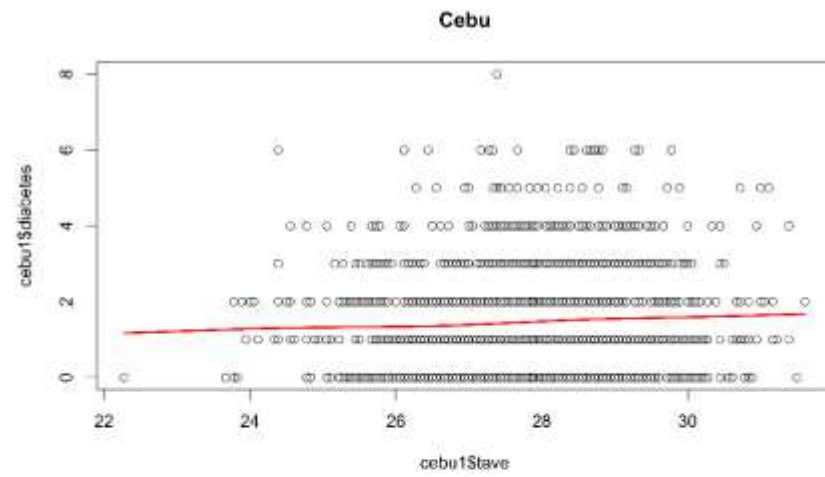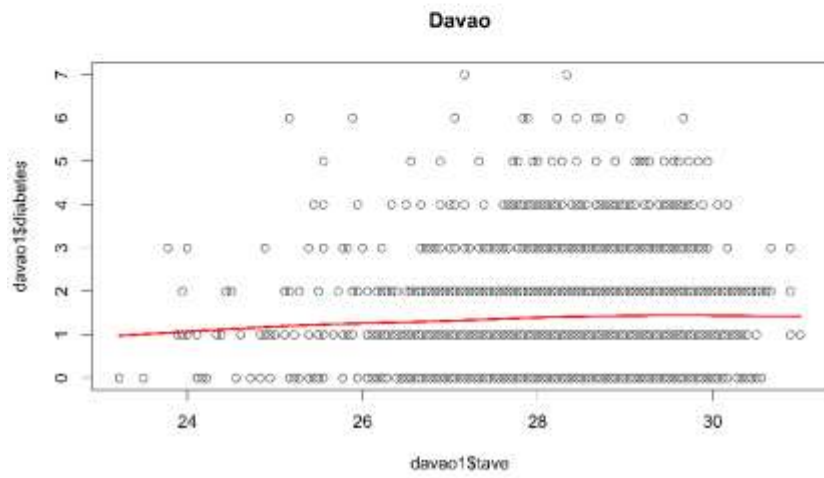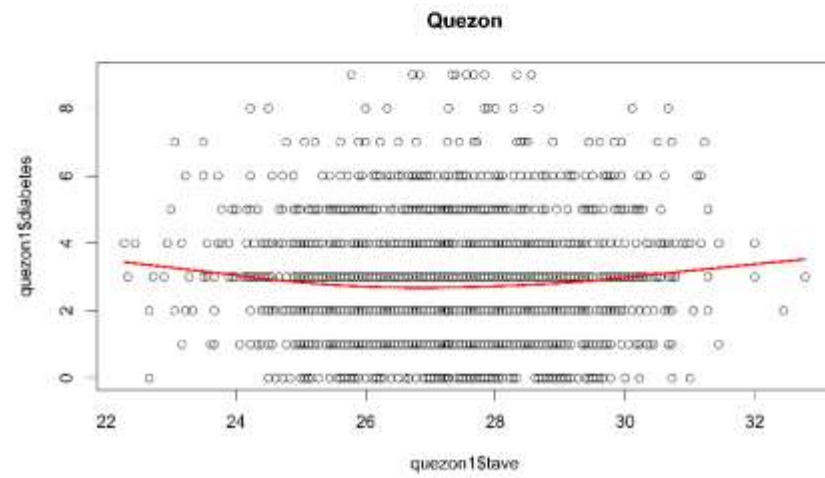

Figure S4. Linear regression of diabetes mortality and average temperature per city

Table S1. Selection of the best combination of df for both temperature and lag dimensions

| Temperature \ Lag | 4 df     | 5 df     | 6 df     | 7 df     | 8 df     | 9 df     | 10 df    | 11 df    | 12 df    | 13 df    | 14 df    | 15 df    | 16 df    | 17 df    | 18 df    | 19 df    | 20 df    |
|-------------------|----------|----------|----------|----------|----------|----------|----------|----------|----------|----------|----------|----------|----------|----------|----------|----------|----------|
| 4 df              | 28886.75 | 28897.06 | 28910.18 | 28922.08 | 28940.78 | 28967.15 | 28979.91 | 28993.06 | 29009.52 | 29017.68 | 29028.39 | 29038.81 | 29056.49 | 29069.55 | 29078.56 | 29097.82 | 29116.7  |
| 5 df              | 28898.84 | 28911.82 | 28931.59 | 28948.3  | 28973.53 | 29002.59 | 29022.03 | 29038.71 | 29057.67 | 29071.67 | 29087.99 | 29105.49 | 29128.93 | 29145.96 | 29159.17 | 29183.46 | 29200.4  |
| 6 df              | 28898.65 | 28912.82 | 28934.1  | 28948.6  | 28983.05 | 29017.47 | 29043.71 | 29067.09 | 29089.77 | 29108.6  | 29130.41 | 29156.85 | 29180.16 | 29203.57 | 29224.12 | 29253.35 | 29267.89 |
| 7 df              | 28917.11 | 28932.74 | 28956.12 | 28974.8  | 29009.18 | 29050.07 | 29080.72 | 29108.89 | 29137.3  | 29158.76 | 29187.86 | 29218.97 | 29249.3  | 29280.73 | 29301.1  | 29329.08 | 29347.39 |
| 8 df              | 28925.25 | 28946.92 | 28975.82 | 28998.53 | 29039.75 | 29084.63 | 29116.36 | 29150.52 | 29180.05 | 29200.54 | 29235.97 | 29275.9  | 29303.3  | 29340.77 | 29364.84 | 29396.71 | 29423.27 |
| 9 df              | 28946.95 | 28974.12 | 29009.57 | 29034.3  | 29081.85 | 29123.6  | 29161    | 29199.76 | 29233.83 | 29259.28 | 29304.51 | 29345.95 | 29381.34 | 29425.56 | 29449.63 | 29486.01 | 29518.45 |
| 10 df             | 28951.09 | 28983.23 | 29015.42 | 29044.71 | 29100.31 | 29142.43 | 29180.9  | 29223.85 | 29261.62 | 29274.89 | 29323.23 | 29369.41 | 29411.99 | 29454.86 | 29479.22 | 29522.72 | 29556.26 |
| 11 df             | 28976.14 | 29014.12 | 29051.03 | 29084.2  | 29143.25 | 29193.6  | 29237.81 | 29288.1  | 29325.98 | 29344.53 | 29402.9  | 29452.94 | 29496.18 | 29545    | 29576.53 | 29626.63 | 29661.48 |
| 12 df             | 28974.91 | 29013.67 | 29050.68 | 29075.2  | 29134.1  | 29192.33 | 29238.14 | 29287.3  | 29331.91 | 29360.98 | 29419.15 | 29473.25 | 29523.05 | 29575.96 | 29614    | 29668.99 | 29705.52 |
| 13 df             | 28993.31 | 29038.32 | 29083.17 | 29119.78 | 29176.68 | 29242.74 | 29290.49 | 29342.25 | 29392.63 | 29421.53 | 29484.23 | 29542.17 | 29594.23 | 29655.38 | 29691.8  | 29749.11 | 29790.11 |
| 14 df             | 29010.96 | 29060.73 | 29109.81 | 29146.92 | 29203.15 | 29272.06 | 29328.13 | 29380.32 | 29432.6  | 29473.64 | 29535.34 | 29599.34 | 29656.32 | 29719.66 | 29766.69 | 29831.95 | 29882.68 |
| 15 df             | 29023.57 | 29074.82 | 29129.46 | 29163.97 | 29216.04 | 29293.7  | 29350.84 | 29411.51 | 29471.25 | 29515.17 | 29580.76 | 29649.85 | 29717.22 | 29785.67 | 29822.94 | 29885.53 | 29941.1  |
| 16 df             | 29044.22 | 29095.24 | 29156.47 | 29190.83 | 29252.87 | 29330.43 | 29395.13 | 29459.15 | 29524.63 | 29573.81 | 29648.89 | 29721.51 | 29784.1  | 29845.45 | 29900.6  | 29975.72 | 30029.58 |
| 17 df             | 29066.31 | 29127.57 | 29196.66 | 29240.1  | 29306.89 | 29393.71 | 29454.7  | 29524.77 | 29596.34 | 29651.17 | 29731.37 | 29813.86 | 29876.02 | 29958.96 | 30015.08 | 30086.49 | 30154.48 |
| 18 df             | 29077.97 | 29136.88 | 29209.99 | 29261.02 | 29327.11 | 29410.14 | 29484.77 | 29552.85 | 29624.58 | 29685.83 | 29766.11 | 29846.6  | 29913.64 | 29990.15 | 30054.24 | 30138.05 | 30184.82 |
| 19 df             | 29095.54 | 29161.01 | 29238.84 | 29289    | 29358.91 | 29448.65 | 29519.31 | 29600.84 | 29671.42 | 29738.67 | 29830.16 | 29919.42 | 29988.92 | 30071.29 | 30134.79 | 30211.44 | 30270.98 |
| 20 df             | 29114.8  | 29180.35 | 29261.68 | 29321.63 | 29386.48 | 29491.22 | 29566.19 | 29641.75 | 29719.68 | 29785.34 | 29885.37 | 29974.5  | 30053.93 | 30138.39 | 30221.36 | 30294.37 | 30354.23 |
